# Supplementary material for: Elevated serum IL-21 levels are associated with stable immune status in kidney transplant recipients and a mouse model of kidney transplantation
Source: publisher site journal article supplement (doi:10.18632/aging.103713), 2020-09-29
Supplement: Supplementary file [file aging-v12i18-103713-supplementary-material-SD1.pdf]

**SUPPLEMENTARY FIGURES**

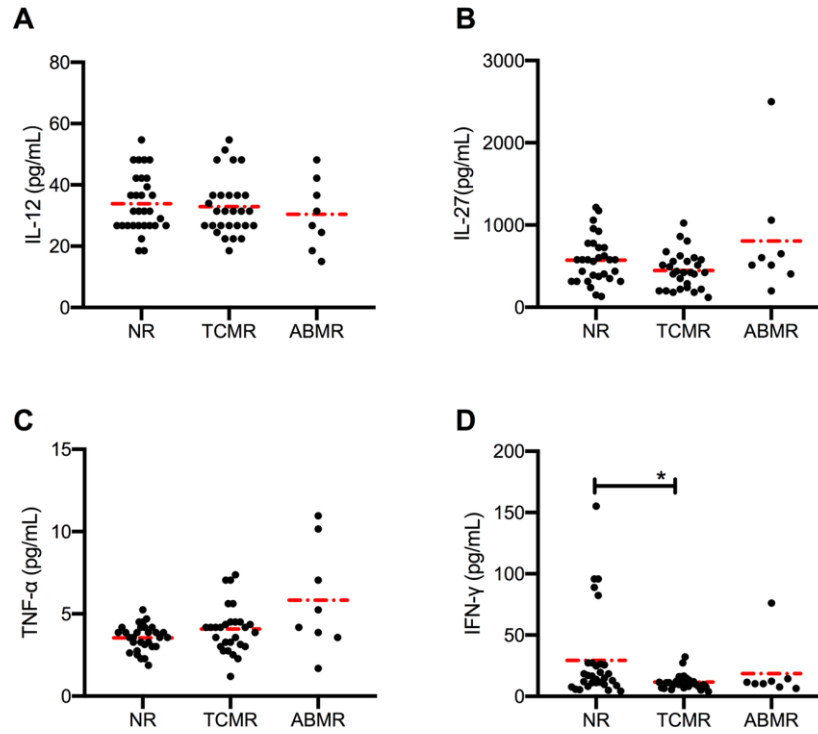

**Supplementary Figure 1. Serum cytokine levels in transplant recipients.** Serum levels of IL-12, IL-27, TNF- $\alpha$ , and IFN- $\gamma$  (A–D) in patients with NR ( $n = 30$ ), TCMR ( $n = 28$ ), and ABMR ( $n = 8$ ) cohorts were measured before the anti-rejection therapy. Red dash dot line represents the mean value. \* $P < 0.05$  compared with NR cohorts. ABMR, antibody-mediated rejection; IFN, interferon; IL, interleukin; TNF, tumor necrosis factor; NR, non-rejection; TCMR, T cell-mediated rejection.

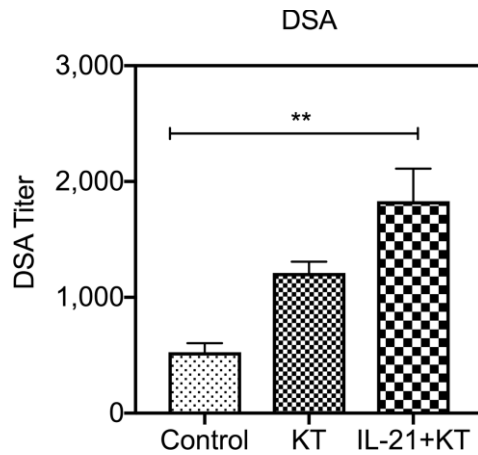

**Supplementary Figure 2. Higher DSA titers were observed after IL-21 administration.** \*\* $P < 0.01$  compared with the control. DSA, donor-specific antibody; IL, interleukin; KT, kidney transplant.

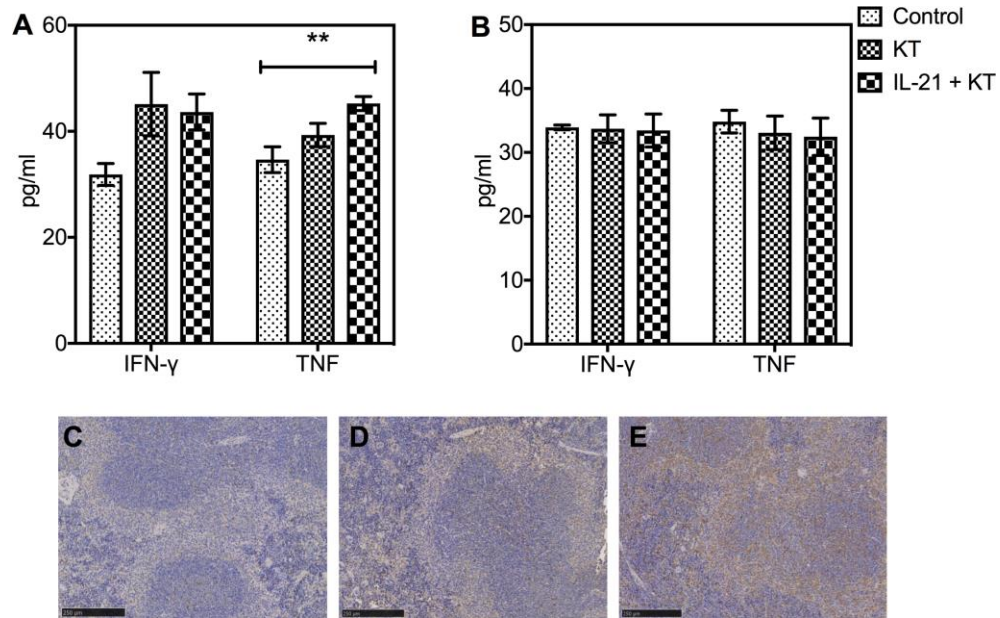

**Supplementary Figure 3. Exogenous IL-21 alters cytokine and IL-21R expression in mice after kidney transplantation.** The levels of IFN- $\gamma$  and TNF- $\alpha$  in (A) the peripheral blood and (B) spleen on day 7 post-transplantation were measured by CBA. The expression of IL-21R in the spleen of (C) control, (D) KT, and (E) IL-21+KT mice on day 7 post-transplantation. Values represent the mean ( $\pm$ SEM). \*\* $P < 0.01$  compared with the control. CBA, cytometric bead array; IFN, interferon; IL, interleukin; KT, kidney transplant; SEM, standard error of the mean; TNF, tumor necrosis factor.
